# Supplementary material
Source: Elsevier journal article supplement (https://www.sciencedirect.com/science/article/pii/S0001731022007591)
Supplement: mmc1 [file S0001731022007591:mmc1.pdf]

## Supplementary material

Supplementary Table 1. ICD-9-CM Codes for selected comorbidities

| Description                  | ICD-9 Code                                                       |
|------------------------------|------------------------------------------------------------------|
| arterial hypertension        | 401                                                              |
| diabetes mellitus            | 250                                                              |
| dyslipidemia                 | 272                                                              |
| obesity                      | 278.0                                                            |
| ischemic heart disease       | 410 - 414                                                        |
| cerebrovascular accident     | 430 - 434                                                        |
| COPD                         | 415.0, 416.8, 416.9, 490 – 496, 500 – 505, 506.4                 |
| heart failure                | 402.11, 402.91, 402.01, 404.01, 404.03, 404.11, 404.93, 425, 428 |
| kidney failure               | 584, 585                                                         |
| depression                   | 311                                                              |
| general anxiety              | 300                                                              |
| malignant neoplasm           | 140 - 209                                                        |
| asthma                       | 493                                                              |
| allergic rhinitis            | 477.9                                                            |
| nasal polyps                 | 471                                                              |
| psoriasis                    | 696.1                                                            |
| rheumatoid arthritis         | 714.0                                                            |
| other autoimmune pathologies | 279.4                                                            |

Supplementary Table 2. ATC Codes for treatments

| Description                                    | ATC Code                                                                                                                                                                                  |
|------------------------------------------------|-------------------------------------------------------------------------------------------------------------------------------------------------------------------------------------------|
| <i>Systemic Treatments</i>                     |                                                                                                                                                                                           |
| Oral corticosteroids                           | H02A                                                                                                                                                                                      |
| Immunosuppressants                             | cyclosporine (L04AD01), azathioprine (L04AX01), methotrexate (L04AX03), mycophenolate mofetil (L04AA06), biological drugs: dupilumab (D11AH05), omalizumab (R03DX05), rituximab (L01XC02) |
| Other systemic drugs                           | immunoglobulins (J06B*), interferon gamma (L03AB*) and hydroxychloroquine (P01BA02)                                                                                                       |
| <i>Non-systemic and concomitant treatments</i> |                                                                                                                                                                                           |
| Topical corticosteroids                        | D07AB, D07AC, D07AD                                                                                                                                                                       |
| Topical immunomodulators                       | tacrolimus (D11AH01); pimecrolimus (D11AH02)                                                                                                                                              |
| Antihistamines                                 | R06                                                                                                                                                                                       |
| Antibiotics                                    | J01                                                                                                                                                                                       |
| Antidepressants                                | N06A                                                                                                                                                                                      |

Supplementary Table 3. Unit costs (2019)

| Healthcare and non-healthcare resources          | Unit costs (€) |
|--------------------------------------------------|----------------|
| <i>Medical visits</i>                            |                |
| Primary Care Medical Visit                       | 23.2           |
| Hospital A&E Medical Visit                       | 117.5          |
| Hospitalization (one day)                        | 480.9          |
| Specialized Care Medical Visit*                  | 92.5           |
| Pain Clinic Visit                                | 185.0          |
| <i>Complementary tests</i>                       |                |
| Laboratory Tests                                 | 32.3           |
| Conventional radiology                           | 28.5           |
| Computerized axial tomography                    | 96.0           |
| Nuclear magnetic resonance                       | 177.0          |
| Other diagnostic tests                           | 47.1           |
| <i>Pharmaceutical prescription</i>               | PVPiva         |
| <i>Work productivity losses - Indirect costs</i> |                |
| Cost per non-worked day                          | 101.21         |

*2019 Unit Costs*

*Source of healthcare resources: own analytical accounting and INE.*

*Values expressed in Euros.*

*RRP: Recommended Retail Price.*

*\*: Only in dermatology, internal medicine and allergy departments.*

Supplementary Figure 1: Flowchart of patient disposition

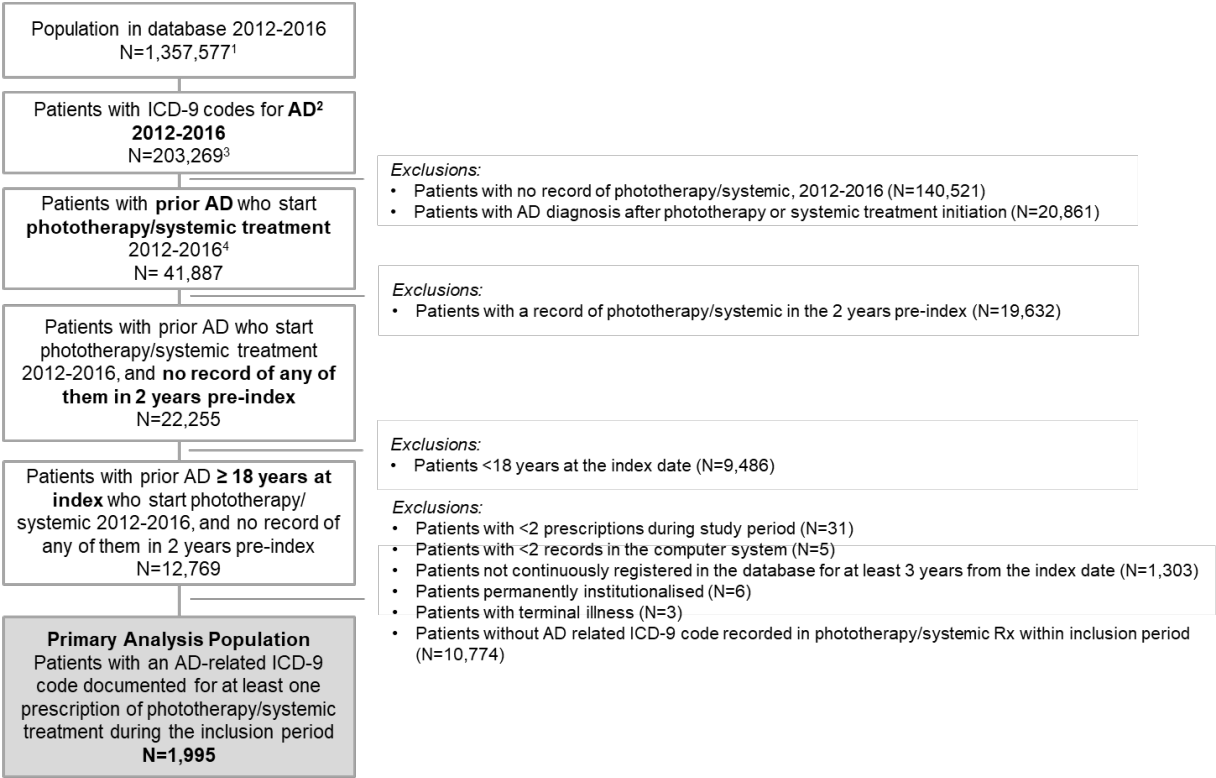

<sup>1</sup> 202,753 <18 years and 1,154,824 ≥ 18 years

<sup>2</sup> AD-related ICD-9 Codes: 691.8 ('Other atopic dermatitis and related conditions') and 692.9 ('Contact dermatitis and other eczema, unspecified cause' with 'allergic' or 'atopic' in the 'description' field of diagnosis in the database)

<sup>3</sup> 68,987 <18 years and 130,282 ≥ 18 years

<sup>4</sup> the date of first systemic treatment initiation or phototherapy between 01/01/2012 and 31/12/2016 is defined as the index date
